# Supplementary material for: A holistic approach to understanding biochemical degradation of human tissues using high resolution MALDI MS
Source: Royal Society of Chemistry journal article supplement (doi:10.1039/d5an00588d), 2025-01-01
Supplement: d5an00588d1.pdf [file d5an00588d1.pdf]

1 **Table S1.** Data available on the donors (n = 13) analyzed in the present study at the REST facility. The table presents personal, demographic, and  
2 medical information available for the donors included in this study. Dates are represented by dd/mm/yyyy.

| <i>Donor ID</i> | <b>Date &amp; time of Death</b>                       | <b>Date &amp; time of arrival at anatomy laboratory</b> | <b>Date &amp; time of arrival at REST</b> | <b>Age</b> | <b>Sex</b> | <b>Weight (kg)</b> | <b>Height (cm)</b> | <b>BMI</b> | <b>Cause of Death</b>                                                                                                                                                         |
|-----------------|-------------------------------------------------------|---------------------------------------------------------|-------------------------------------------|------------|------------|--------------------|--------------------|------------|-------------------------------------------------------------------------------------------------------------------------------------------------------------------------------|
| 2               | 07/08/2020 at 12:00 pm                                | 08/08/2020 11:18 am                                     | 10/08/2020                                | 71         | M          | 70                 | 173                | 23.3       | Hepatic cirrhosis, anuric renal insufficiency                                                                                                                                 |
| 6               | 10/05/2021 at 01:00 am                                | 10/05/2021 at 4:30 pm                                   | 11/05/2021 at 11:00 am                    | 77         | M          | 79.5               | 177                | 25.2       | Stage 4 Metastatic melanoma in lungs, brain, bones, muscles, kidneys, adrenal glands, and liver                                                                               |
| 9               | 30/07/2021 at 08:00 am                                | 30/07/2021 at 9:30 am                                   | 01/08/2021 at 10:10 am                    | 72         | F          | 65.7               | 155                | 27.8       |                                                                                                                                                                               |
| 10              | 30/09/2021 at 08:30 pm                                | 01/10/2021 at 8:30 pm                                   | 02/10/2021 at 11:45am                     | 78         | M          | 56                 | 185                | 16.3       | Advanced lung neoplasia                                                                                                                                                       |
| 11              | 11/10/2021 at 8:30 am                                 | 11/10/2021 at 5:00 pm                                   | 12/10/2021 at 11:00 am                    | 54         | M          | 44                 | 163                | 16.5       | Metastatic lung cancer                                                                                                                                                        |
| 12              | 11/11/2021 at 11:32 am                                | 11/11/2021 at 11:00 pm                                  | 12/11/2021 at 11:00 am                    | 73         | F          | 60                 | 155                | 24.9       | Lung neoplasia                                                                                                                                                                |
| 13              | 12/04/2022 at 2:15 pm                                 | 12/04/2022 at 5:15 pm                                   | 13/04/2022 at 01:30 pm                    | 86         | M          | 63.5               | 173                | 21.2       | Lung neoplasia                                                                                                                                                                |
| 16              | 25/05/2022 at 06:40 am                                | 26/05/2022 at 10:10 pm                                  | 27/05/2022 at 10:00                       | 80         | M          | 75                 | 170                | 26         | Thoracic-abdominal ruptured aneurysm, atherosclerotic disease, MCAS [Mass Cell Activation Syndrome], MVAS [atherosclerotic disease], atrial fibrillation, high blood pressure |
| 17              | 14/06/2022                                            | 15/06/2022 at 08:00 pm                                  | 16/06/2022 at 10:30am                     | 73         | M          | 113                | 188                | 32         | NA. Medically assisted death on 14/06/2022                                                                                                                                    |
| 22              | 02/05/2023 at 03:45 am                                | 02/05/2023 at 12:30 pm                                  | 04/05/2023 at 12:00 pm                    | 80         | M          | 56.7               | 170                | 19.6       | Lung neoplasia                                                                                                                                                                |
| 23              | 19/06/2023 at 11:30 pm                                | 20/06/2023 at 04:00 pm                                  | 21/06/2023 at 09:00 am                    | 86         | M          | 61.1               | 158                | 24         | Geriatric cachexia following a stroke                                                                                                                                         |
| 24              | 29/07/2023 after 8:30 pm (last seen alive until then) | 01/08/2023 at 9:00 am                                   | 01/08/2023 at 10:00 am                    | 70         | M          | 81                 | 165                | 29         | Asphyxiation due to hanging                                                                                                                                                   |
| 25              | 24/08/2023 at 6:50 pm                                 | 24/08/2023 at 11:25 pm                                  | 25/08/2023 at 03:00 pm                    | 75         | M          | 67.3               | 175                | 22         | Portal hypertension with ascites, hepatic encephalopathy, cirrhosis, high blood pressure                                                                                      |
| 75              | 65.7                                                  | 170                                                     | 24                                        |            |            |                    |                    |            |                                                                                                                                                                               |

4 **Note S1:** Matrix Application Using MedPro Compressor Nebulizer

5 A MedPro™ Compressor Nebulizer (AMG Medical Inc., QC, Canada) was adapted for use as a  
6 matrix sprayer and employed during both optimization and final analytical runs of MALDI-MS.  
7 The device operates using compressed air (35–45 psi) to produce aerosol droplets in the 0.5–  
8 5 µm range, with an airflow rate of 6–9 L/min. The nebulizer output was connected via flexible  
9 plastic tubing (~1 cm inner diameter) into a sealed polypropylene container (~3 L volume)  
10 containing the MALDI plate.

11 For each coating, approximately 6 mL of matrix solution was added to the nebulizer chamber.  
12 The unit was activated for 5 minutes, filling the container with a dense, fine mist. The matrix was  
13 then allowed to settle passively onto the plate for 15 minutes before removal and gentle drying  
14 under high-purity nitrogen gas for 10 minutes.

15 This passive deposition setup minimized airflow disturbances and allowed even aerosol  
16 distribution. Although originally designed for respiratory therapy, the nebulizer produced droplets  
17 of appropriate size and density to support stable matrix crystallization and consistent ionization  
18 performance across tissue sections. This setup offered an accessible and efficient alternative to  
19 commercial sprayers

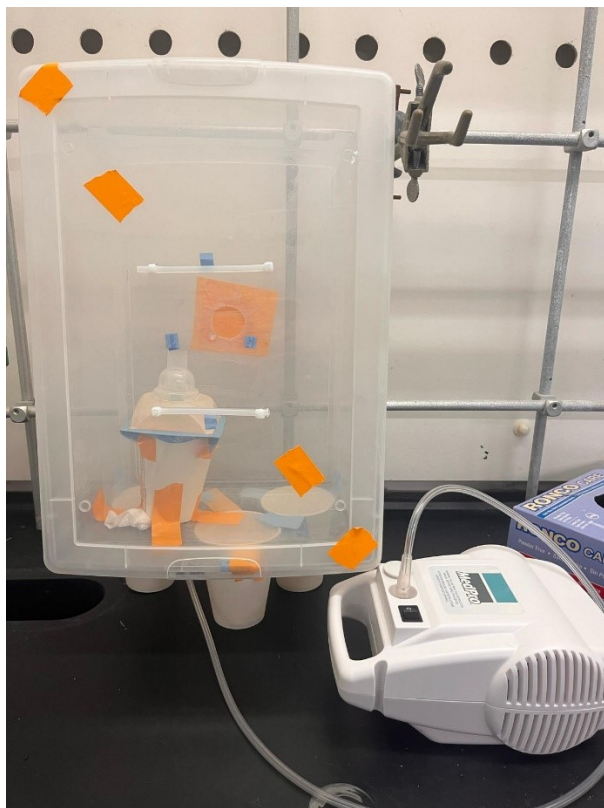

20  
21 **Fig. S1:** Custom matrix sprayer setup used for application of MALDI matrix. A modified airtight  
22 plastic chamber was connected to a nebulizer compressor via tubing to create a controlled  
23 airflow system. Inside the chamber, matrix solution was nebulized allowing even coating of  
24 tissue samples placed below.

**Table S2.** Summary of compound class counts within each Van Krevelen region across all donors. These raw counts represent the number of molecular features assigned to each compound class category and were used as input variables for the principal component analysis (PCA).

| Donor | Amino-sugars | Carbohydrates | Condensed Aromatics | Lignin | Lipids | Proteins/Peptides | Unsaturated Hydrocarbons |
|-------|--------------|---------------|---------------------|--------|--------|-------------------|--------------------------|
| 2     | 59           | 122           | 308                 | 382    | 104    | 302               | 76                       |
| 6     | 18           | 35            | 102                 | 140    | 69     | 134               | 34                       |
| 9     | 68           | 177           | 260                 | 505    | 267    | 593               | 113                      |
| 10    | 72           | 151           | 287                 | 571    | 107    | 471               | 99                       |
| 11    | 25           | 50            | 106                 | 209    | 72     | 218               | 32                       |
| 12    | 76           | 159           | 402                 | 530    | 146    | 371               | 121                      |
| 13    | 27           | 57            | 133                 | 189    | 62     | 151               | 42                       |
| 16    | 27           | 77            | 186                 | 304    | 113    | 255               | 62                       |
| 17    | 34           | 94            | 164                 | 269    | 88     | 320               | 46                       |
| 22    | 664          | 962           | 1974                | 3864   | 754    | 2930              | 1335                     |
| 23    | 555          | 971           | 2004                | 3303   | 552    | 2009              | 1026                     |
| 24    | 436          | 689           | 1693                | 2385   | 436    | 1702              | 758                      |
| 25    | 267          | 351           | 865                 | 1387   | 299    | 1175              | 605                      |

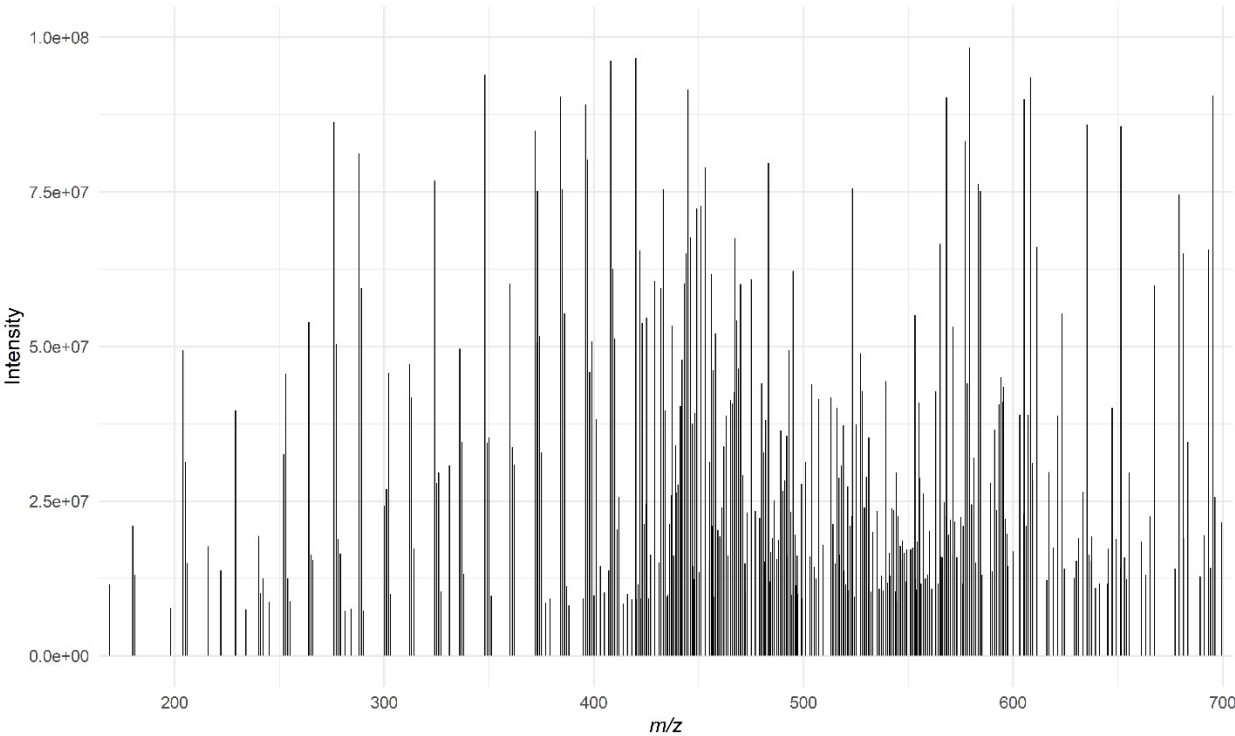

**Fig. S2** Raw MALDI-MS spectrum (Donor 23, PMI 6)



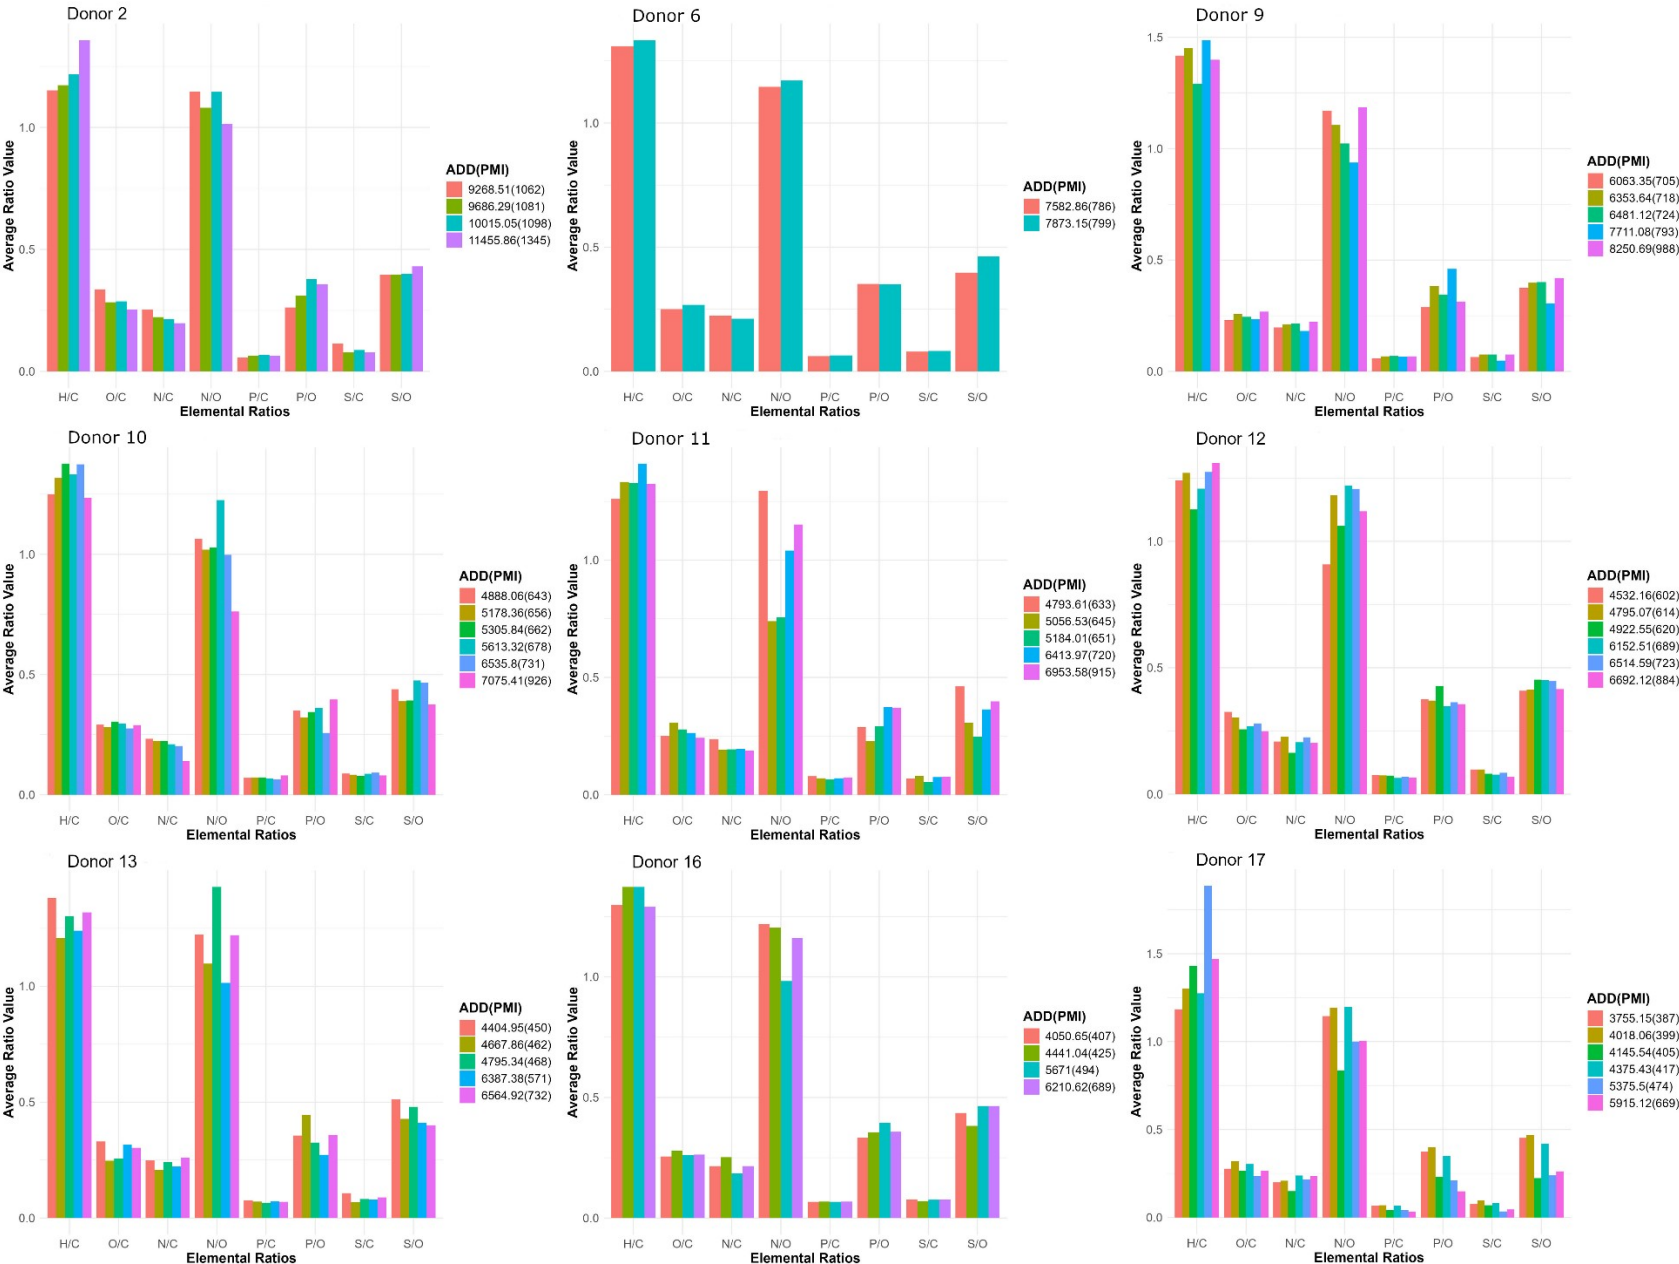

**Fig. S3** Elemental ratios (H/C, O/C, N/C, N/O, P/C, P/O, S/C, and S/O) plotted as a function of PMI for Donor 2, 6, 9, 10, 11, 12, 16, 17. Bars represent the average ratio values calculated for each sampling event, color-coded according to the PMI (in days), and ADD. The plot highlights temporal changes in elemental composition, with distinct trends observed across the different ratios.

40 **Table S3.** Summary of linear regression model results for donors 22 to 25

| <i>Elemental<br/>Ratio</i> | <b>Donor</b> | <b>CI Low</b> | <b>CI High</b> | <b>R<sup>2</sup></b> | <b>Adjusted R<sup>2</sup></b> | <b>p value</b> |
|----------------------------|--------------|---------------|----------------|----------------------|-------------------------------|----------------|
| <i>H/C</i>                 | 22           | -0.027        | 0.019          | 0.009                | - 0.057                       | 0.723          |
|                            | 23           | -0.037        | 0.023          | 0.017                | - 0.0582                      | 0.639          |
|                            | 24           | 0.012         | 0.073          | 0.487                | 0.435                         | 0.012          |
|                            | 25           | -0.019        | 0.076          | 0.266                | 0.143                         | 0.191          |
| <i>O/C</i>                 | 22           | -0.011        | 0.005          | 0.045                | - 0.019                       | 0.415          |
|                            | 23           | -0.013        | 0.001          | 0.226                | 0.167                         | 0.073          |
|                            | 24           | -0.016        | -0.008         | 0.801                | 0.781                         | 0.00008        |
|                            | 25           | -0.005        | 0.014          | 0.159                | 0.019                         | 0.328          |
| <i>N/C</i>                 | 22           | -0.004        | 0.013          | 0.086                | 0.025                         | 0.255          |
|                            | 23           | 0.002         | 0.031          | 0.324                | 0.272                         | 0.027          |
|                            | 24           | 0.012         | 0.025          | 0.811                | 0.792                         | 0.00006        |
|                            | 25           | 0.007         | 0.027          | 0.754                | 0.713                         | 0.005          |
| <i>N/O</i>                 | 22           | -0.001        | 0.058          | 0.222                | 0.170                         | 0.056          |
|                            | 23           | 0.006         | 0.133          | 0.300                | 0.246                         | 0.035          |
|                            | 24           | 0.081         | 0.149          | 0.849                | 0.834                         | 0.00002        |
|                            | 25           | 0.009         | 0.071          | 0.624                | 0.561                         | 0.020          |
| <i>S/O</i>                 | 22           | -0.008        | 0.023          | 0.065                | 0.003                         | 0.323          |
|                            | 23           | 0.005         | 0.042          | 0.370                | 0.321                         | 0.016          |
|                            | 24           | 0.020         | 0.048          | 0.742                | 0.717                         | 0.00032        |
|                            | 25           | -0.004        | 0.033          | 0.395                | 0.295                         | 0.095          |

41

42
